# Supplementary material
Source: MDPI journal article supplement (https://www.mdpi.com/1996-1073/15/13/4932)
Supplement: s1 [file s1]

# Supporting Information

## Mesoporous VCN nanobelts For High-Performance Flexible Zn-ion batteries

*Zeyan Zhou<sup>1,\*</sup>, Taotao Zeng<sup>1</sup>, Haoran Zhang<sup>3</sup>, Ding Chen<sup>1, 2,\*</sup>*

*<sup>1</sup>School of Materials Science and Engineering, Hunan University, Changsha City, 410082, P.R. China.*

*<sup>2</sup>State Key Laboratory of Advanced Design and Manufacturing for Vehicle Body, College of Mechanical and Vehicle Engineering, Hunan University, Changsha City, 410082, People's Republic of China*

*<sup>3</sup>National Engineering Research Center for Marine Aquaculture, Marine Science and Technology College, Zhejiang Ocean University, Zhoushan, Zhejiang Province 316004, China*

Corresponding authors. E-mails: [zhouzeyan@hnu.edu.cn](mailto:zhouzeyan@hnu.edu.cn) (Z. Zhou)  
[chending@hnu.edu.cn](mailto:chending@hnu.edu.cn) (D. Chen)

The capacitances  $C_{\text{device}}$  (F) were calculated from discharging profiles (GCD) according to equation (1):

$$C_{\text{device}} = It/U \quad (1)$$

in which  $U$ (V) is the working voltage window;  $v$  ( $\text{V s}^{-1}$ ) is the scan rate;  $I$ (A) is the current. And areal capacitances  $C_A$  ( $\text{F cm}^{-2}$ ) were calculated by the following equation:

$$C_A = C_{\text{device}}/A \quad (2)$$

in which  $A(\text{cm}^2)$  is the effective area of the device.

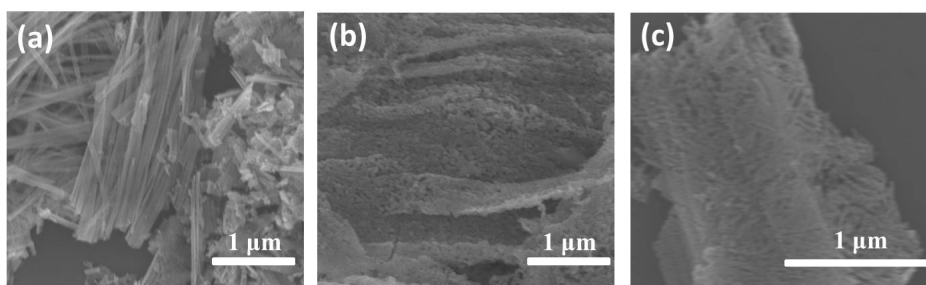

**Figure S1.** Typical SEM of sample (a) VN, (b) VCN-1 and (c) VCN-3.

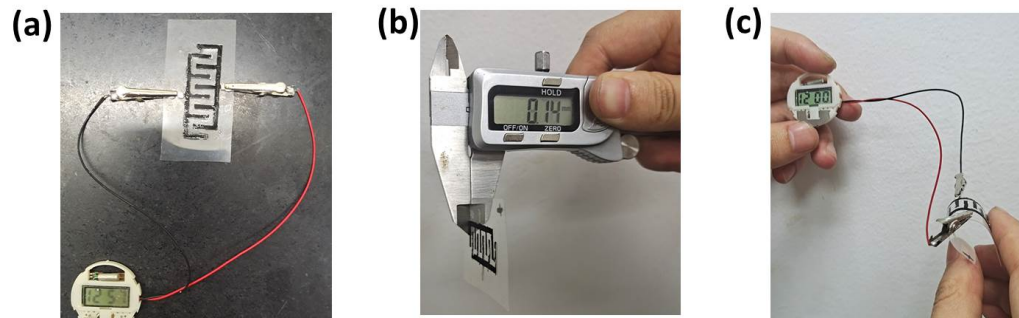

**Figure S2.** (a) the flexible battery after 1h can still power a digital clock normally. (b) Thickness of the FZIB, the number shows that only 0.14 mm. (c) The flexibility test of the FZIB.

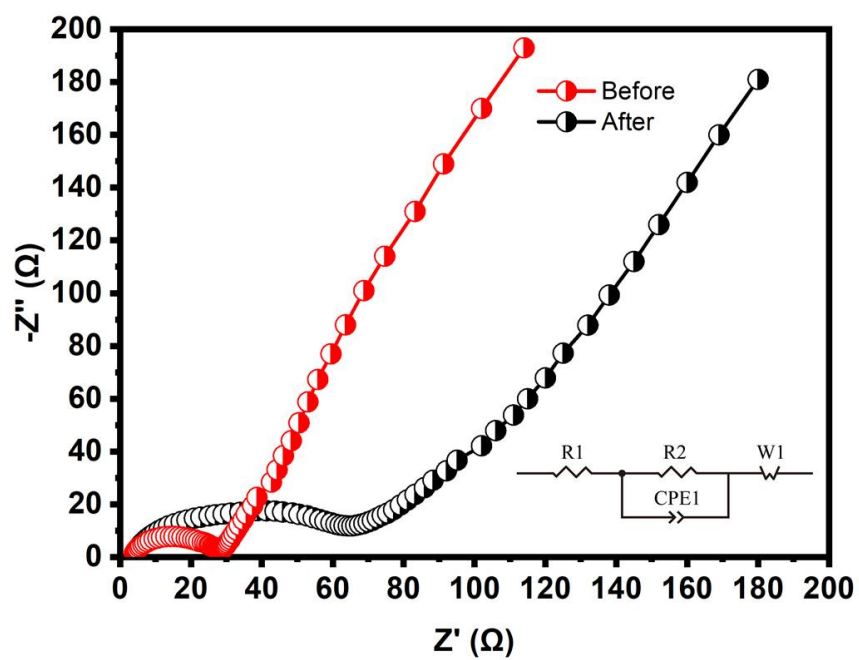

**Figure S3.** EIS curve before and after cycling, with the equivalent circuit model in the lower right corner.

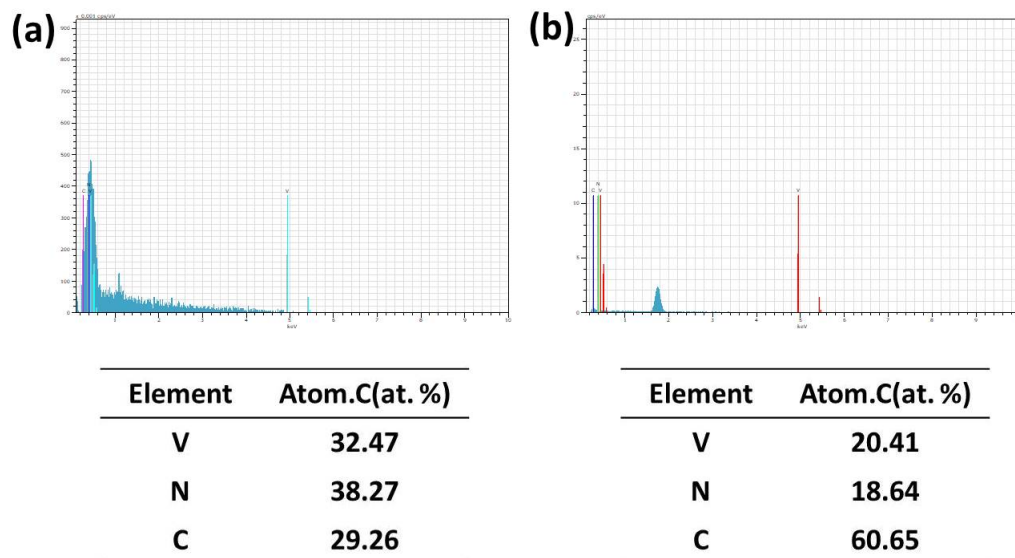

**Figure S4.** Representative EDX spectrum of sample (a)VCN-1 and (b)VCN-3.

**Table S1. Comparison of Electrochemical performance between VCN electrode and other previously reported Vanadium-based Electrodes**

| Electrode                                                                             | Electrolyte                                                                    | Capability | Ref.         |
|---------------------------------------------------------------------------------------|--------------------------------------------------------------------------------|------------|--------------|
| $\text{Zn}_3\text{V}_2\text{O}_7(\text{OH})_2 \cdot 2\text{H}_2\text{O}@\text{HfO}_2$ | 1 M $\text{ZnSO}_4(\text{L})$                                                  | 227/0.2    | <sup>1</sup> |
| $\text{Ba}_{1.2}\text{V}_6\text{O}_{16} \cdot 3\text{H}_2\text{O}$                    | 2 M $\text{ZnSO}_4(\text{L})$                                                  | 241/0.5    | <sup>2</sup> |
| $\text{Zn-VO}(\text{CH}_2\text{O})_2$                                                 | 3 M $\text{Zn}(\text{CF}_3\text{SO}_3)_2(\text{L})$                            | 217/0.1    | <sup>3</sup> |
| Polyaniline-VOH                                                                       | 3 M $\text{Zn}(\text{TfO})_2$ + 6 M<br>$\text{LiTFSI}(\text{L})$               | 323/1      | <sup>4</sup> |
| $\text{K}_2\text{V}_3\text{O}_8$                                                      | 3 M $\text{Zn}(\text{CF}_3\text{SO}_3)_2(\text{L})$                            | 302.8/0.1  | <sup>5</sup> |
| $\text{NaV}_3\text{O}_8$                                                              | 3 M $\text{ZnSO}_4$ + 0.5 M<br>$\text{Na}_2\text{SO}_4(\text{L})$              | 280/0.05   | <sup>6</sup> |
| $\text{NaVPO}_4\text{F/C}$                                                            | 15 M $\text{NaClO}_4$ + 1 M<br>$\text{Zn}(\text{CF}_3\text{SO}_3)_2(\text{L})$ | 89.6/0.1   | <sup>7</sup> |
| Urchin-like spinel $\text{MgV}_2\text{O}_4$                                           | 2 M $\text{Zn}(\text{CF}_3\text{SO}_3)_2(\text{L})$                            | 272/0.2    | <sup>8</sup> |
| Coral VN/C                                                                            | 3.5 M $\text{ZnSO}_4(\text{L})$                                                | 322/0.5    | <sup>9</sup> |
| Mesoporous VCN nanobelts                                                              | PVA/KOH + 2 M $\text{ZnSO}_4(\text{S})$                                        | 318.2/0.3  | This<br>work |

## References

- Guo, J.; Ming, J.; Lei, Y.; Zhang, W.; Xia, C.; Cui, Y.; Alshareef, H. N., Artificial Solid Electrolyte Interphase for Suppressing Surface Reactions and Cathode Dissolution in Aqueous Zinc Ion Batteries. *ACS Energy Lett.* **2019**, *4* (12), 2776-2781.
- Wang, X.; Xi, B.; Ma, X.; Feng, Z.; Jia, Y.; Feng, J.; Qian, Y.; Xiong, S., Boosting Zinc-Ion Storage Capability by Effectively Suppressing Vanadium Dissolution Based on Robust Layered Barium Vanadate. *Nano Lett.* **2020**, *20* (4), 2899-2906.
- Tang, W.; Lan, B.; Tang, C.; An, Q.; Chen, L.; Zhang, W.; Zuo, C.; Dong, S.; Luo, P., Urchin-like Spinel  $\text{MgV}_2\text{O}_4$  as a Cathode Material for Aqueous Zinc-Ion Batteries. *ACS Sustainable Chemistry & Engineering* **2020**, *8* (9), 3681-3688.
- Bin, D.; Wang, Y.; Tamirat, A. G.; Zhu, P.; Yang, B.; Wang, J.; Huang, J.; Xia, Y., Stable High-Voltage Aqueous Zinc Battery Based on Carbon-Coated  $\text{NaVPO}_4\text{F}$  Cathode. *ACS Sustainable Chemistry & Engineering* **2021**, *9* (8), 3223-3231.
- Shan, X.; Kim, S.; Abeykoon, A. M. M.; Kwon, G.; Olds, D.; Teng, X., Potentiodynamics of the Zinc and Proton Storage in Disordered Sodium Vanadate for Aqueous Zn-Ion Batteries. *ACS*

*Appl. Mater. Interfaces* **2020**, *12* (49), 54627-54636.

6. Li, Z.; Wu, B.; Yan, M.; He, L.; Xu, L.; Zhang, G.; Xiong, T.; Luo, W.; Mai, L., Novel Charging-Optimized Cathode for a Fast and High-Capacity Zinc-Ion Battery. *ACS Appl. Mater. Interfaces* **2020**, *12* (9), 10420-10427.
7. Wang, M.; Zhang, J.; Zhang, L.; Li, J.; Wang, W.; Yang, Z.; Zhang, L.; Wang, Y.; Chen, J.; Huang, Y.; Mitlin, D.; Li, X., Graphene-like Vanadium Oxygen Hydrate (VOH) Nanosheets Intercalated and Exfoliated by Polyaniline (PANI) for Aqueous Zinc-Ion Batteries (ZIBs). *ACS Appl. Mater. Interfaces* **2020**, *12* (28), 31564-31574.
8. Nagaraj, R.; Pakhira, S.; Aruchamy, K.; Yadav, P.; Mondal, D.; Dharmalingam, K.; Sanna Kotrappanavar, N.; Ghosh, D., Catalyzing the Intercalation Storage Capacity of Aqueous Zinc-Ion Battery Constructed with Zn(II) Preinserted Organo-Vanadyl Hybrid Cathode. *ACS Applied Energy Materials* **2020**, *3* (4), 3425-3434.
9. Su, Q.; Rong, Y.; Chen, H.; Wu, J.; Yang, Z.; Deng, L.; Fu, Z., Carbon-Doped Vanadium Nitride Used as a Cathode of High-Performance Aqueous Zinc Ion Batteries. *Industrial & Engineering Chemistry Research* **2021**, *60* (33), 12155-12165.
